# Supplementary material for: A factor converting viable but nonculturable Vibrio cholerae to a culturable state in eukaryotic cells is a human catalase
Source: PubMed Central journal article supplement (PMC4554454; doi:10.1002/mbo3.264), 2015-05-13

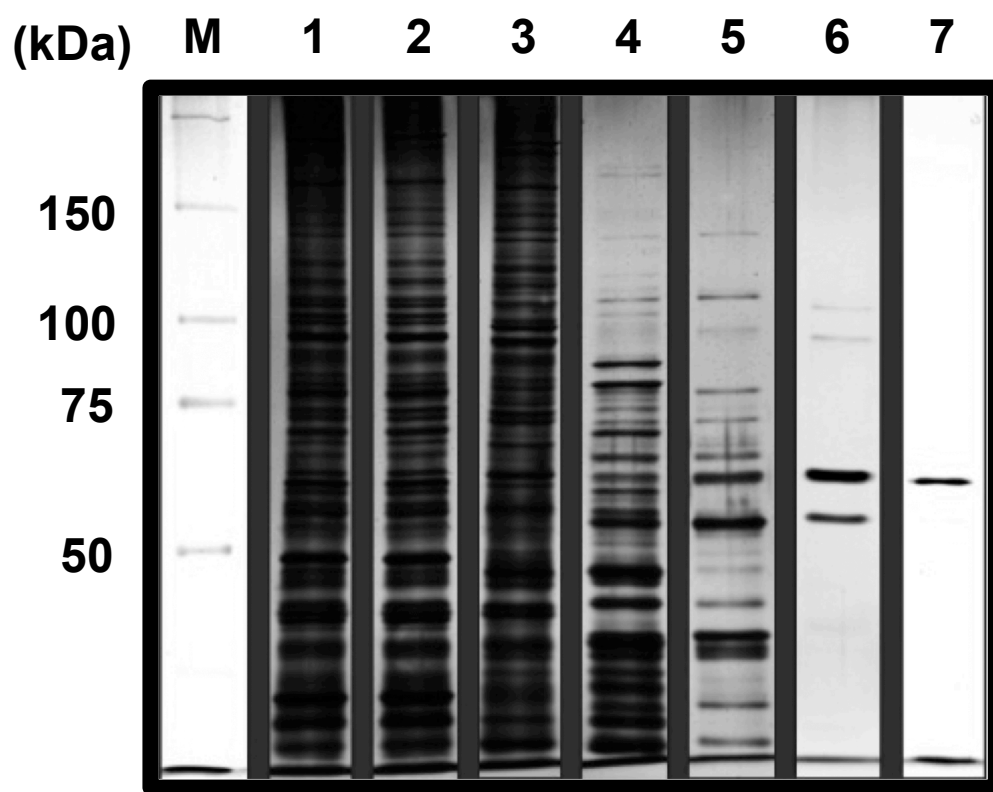

Supplement: mbo30004-0589-sd2.pdf [file mbo30004-0589-sd2.pdf]
