# Supplementary material for: A factor converting viable but nonculturable Vibrio cholerae to a culturable state in eukaryotic cells is a human catalase
Source: PubMed Central journal article supplement (PMC4554454; doi:10.1002/mbo3.264), 2015-05-13
Supplement: mbo30004-0589-sd3.pdf [file mbo30004-0589-sd3.pdf]

1 **MADSRDPASD** **QMQHWKEQRA** **AQKADVLTTG** **AGNPVGDKLN** **VITVGPRGPL**  
51 **LVQDVVFTDE** **MAHFDREERIP** **ERVVHAKGAG** **AFGYFEVTHD** **ITKYSKAKVF**  
101 **EHIGKKTPIA** **VRFSTVAGES** **GSADTVRDPR** **GFAVKFYTED** **GNWDLVGNNT**  
151 **PIFFIRDPIL** **FPSFIHSQKR** **NPQTHLKDPD** **MVWDFWSLRP** **ESLHQVSFLF**  
201 **SDRGIPDGHR** **HMNGYGSHTF** **KLVNANGEAV** **YCKFHYKTDQ** **GIKNSVEDA**  
251 **ARLSQEDPDY** **GIRDLFNAIA** **TGKYPSWTFY** **IQVMTFNQAE** **TFPFNPFDLT**  
301 **KVWPHKDYPL** **IPVGKLVVLR** **NPVNYFAEVE** **QIAFDPSNMP** **PGIEASPKM**  
351 **LQGRLFAYPD** **THRHLGPNY** **LHIPVNCPIR** **ARVANYQRDG** **PMCMQDNQGG**  
401 **APNYYPNSFG** **APEQQPSALE** **HSIQYSGEVR** **RFNTANDDNV** **TQVRAFVNV**  
451 **LNEEQKRLC** **ENIAGHLKDA** **QIFIQKAVK** **NFTEVHPDYG** **SHIQALLDKY**  
501 **NAEKPKNAIH** **TFVQSGSHLA** **AREKANL**
